# Supplementary material for: A high-efficiency superhydrophobic plasma separator
Source: Royal Society of Chemistry journal article supplement (doi:10.1039/c5lc01235j), 2015-12-21
Supplement: c5lc01235j1.pdf [file c5lc01235j1.pdf]

## Supplementary Information

# A High-Efficiency Superhydrophobic Plasma Separator

Changchun Liu<sup>1\*</sup>, Shih-Chuan Liao<sup>1,5</sup>, Jinzhao Song<sup>1</sup>, Michael G. Mauk<sup>1</sup>, Xuanwen Li<sup>2</sup>, Gaoxiang Wu<sup>3</sup>,  
Dengteng Ge<sup>3</sup>, Robert M. Greenberg<sup>4</sup>, Shu Yang<sup>3</sup> and Haim H. Bau<sup>1</sup>

<sup>1</sup>Department of Mechanical Engineering and Applied Mechanics,

<sup>2</sup>Institute for Translational Medicine and Therapeutics, Perelman School of Medicine

<sup>3</sup>Department of Materials Science and Engineering, 3231 Walnut Street, Philadelphia, PA 19104, USA

<sup>4</sup>Department of Pathobiology, School of Veterinary Medicine

University of Pennsylvania, Philadelphia, Pennsylvania 19104, USA

<sup>5</sup>Department of Biomechanics Engineering, National Pingtung University of Science and Technology, Pingtung 912, Taiwan, ROC

### \* Corresponding author

Dr. Changchun Liu

Department of Mechanical Engineering and Applied Mechanics

University of Pennsylvania

210 Towne Building

220 South 33<sup>rd</sup> St.

Philadelphia, Pennsylvania 19104-6315, USA

Phone: (215)898-1380

E-mail: lchangc@seas.upenn.edu

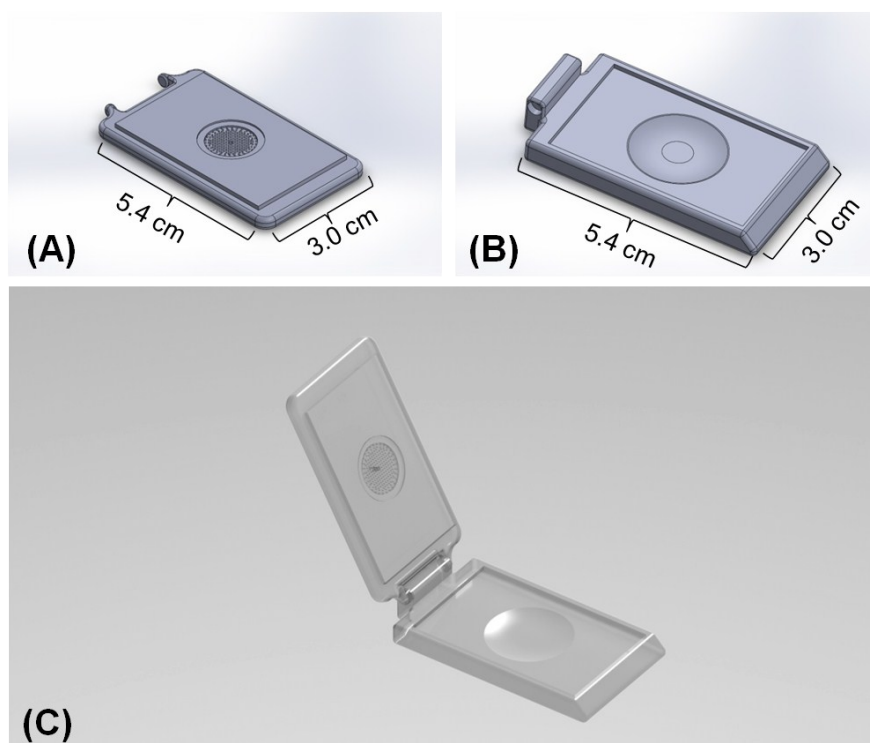

**Fig. S1:** A schematic illustration of the 3D-printed top cover (A) and 3D-printed bottom substrate (B). (C) A schematic illustration of an assembled plasma separator.

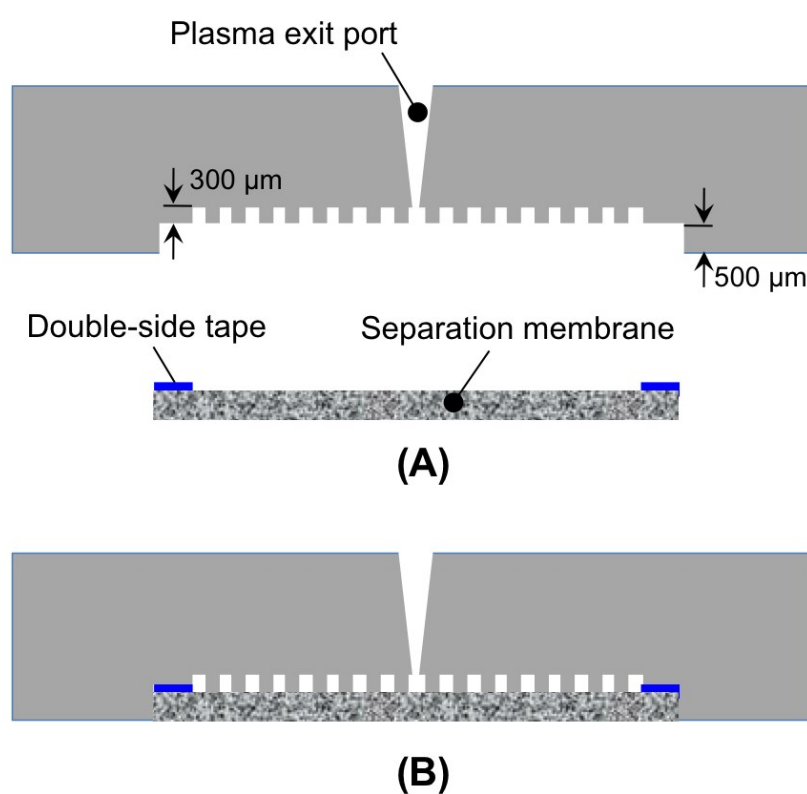

**Fig. S2:** A cross-section illustration of the top cover before (A) and after (B) assembling the separation membrane.

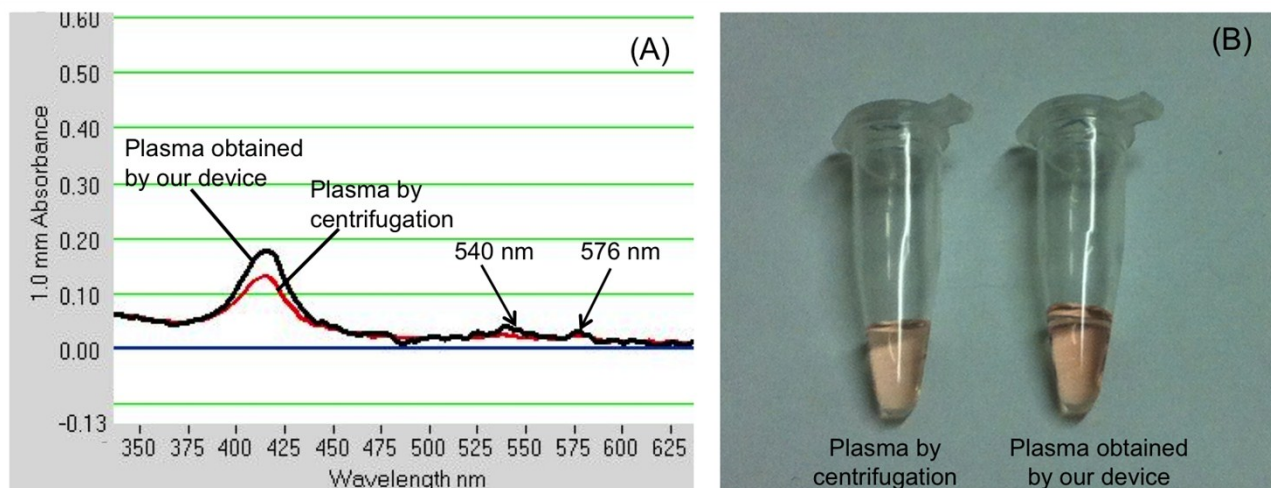

**Fig. S3:** (A) The absorbance spectra of plasma extracted by our superhydrophobic plasma separator (black) and by benchtop centrifugation (red). (B) Optical images of plasma isolated with our device and centrifuged plasma.

#### Blood cell sedimentation by gravity

To observe cell gravitational sedimentation, we designed and fabricated a simple microscope cover slip/double-sided tape hybrid device (**Fig. S4 (A)**). In this experiment, one blood droplet was first sandwiched between two microscope cover slips (Fisher Scientific, No. 12-544-E) under the assistance of double-sided tape spacers (~150  $\mu\text{m}$  thickness) (3M™ Double Coated Tape 9500PC Clear). Then, the device was placed vertically and the blood sedimentation process was recorded by a USB microscope (Dino-Lite USB Digital Microscope) (**Fig. S4(A)**). **Fig. S4(B)** is a sequence of images of blood at 0, 2 and 5 minutes after gravitational sedimentation. The longer the sedimentation time, the clearer the blood cell/plasma interface is.

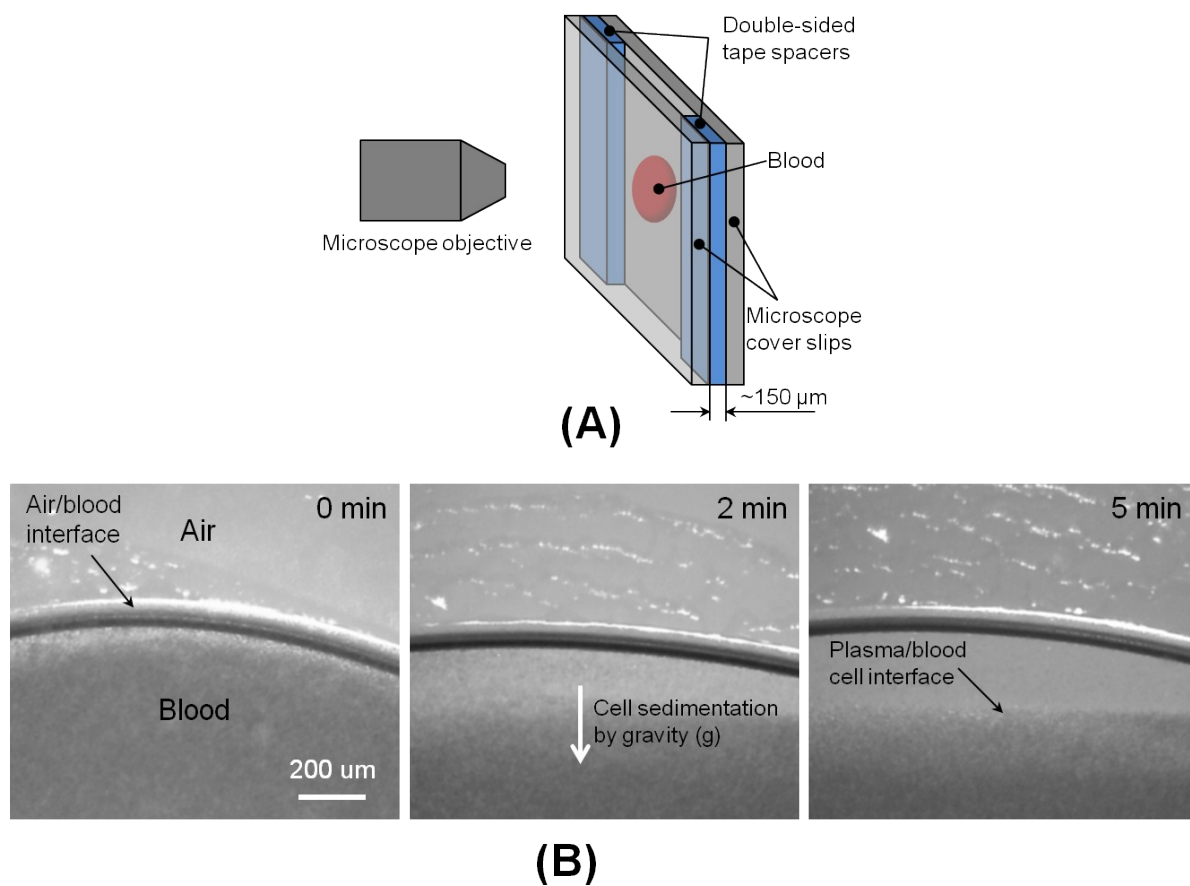

**Fig. S4:** (A) An experimental setup to observe blood cell sedimentation by gravity. (B) A sequence of images illustrating the blood cell gravitational sedimentation.

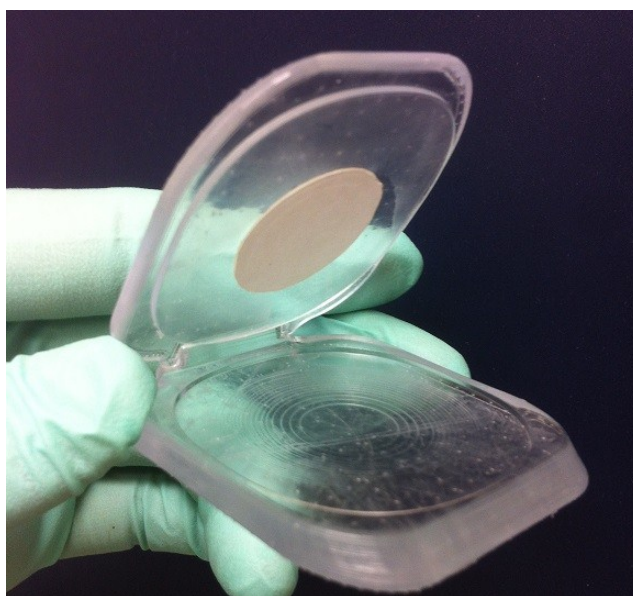

**Fig. S5:** A photograph of a modified superhydrophobic plasma separator that processes 800  $\mu\text{L}$  of whole blood.

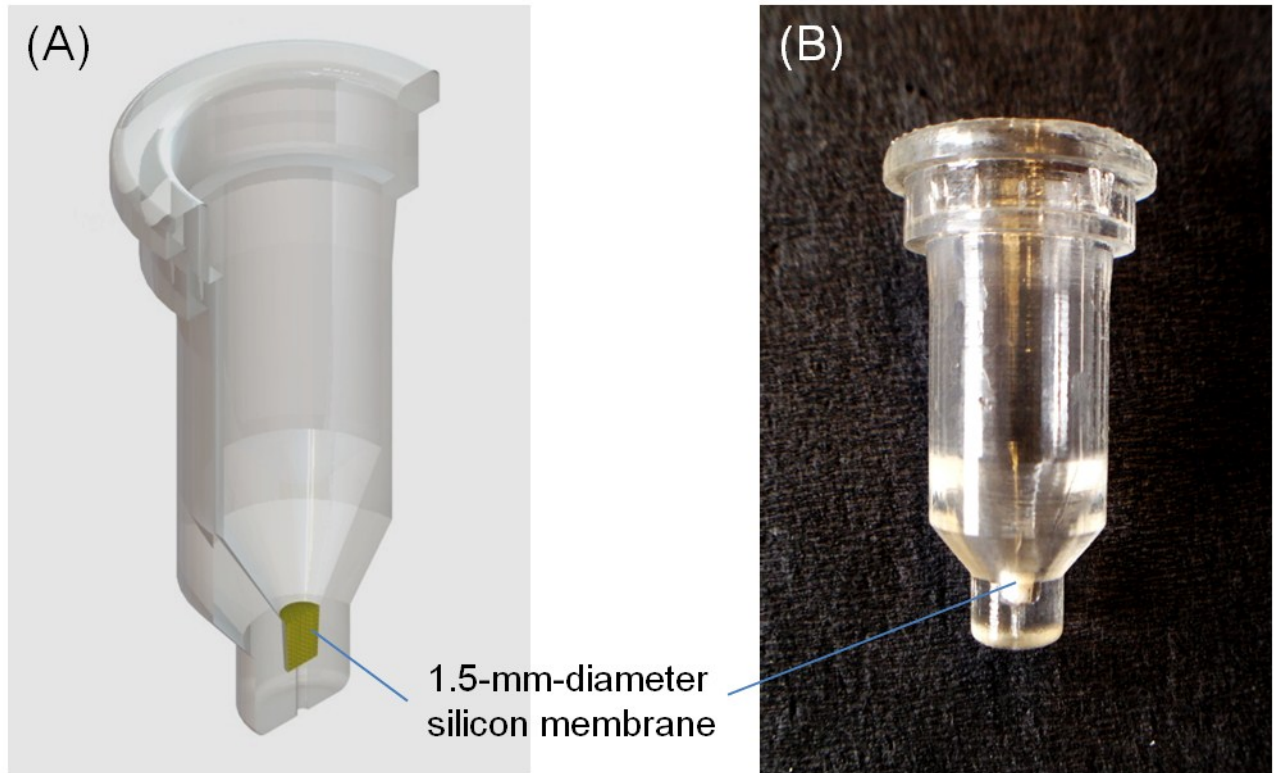

**Fig. S6:** 3D-printed tube with 1.5-mm-diameter silicon membrane for cell-free schistosome genomic DNA extraction: (A) schematic illustration of the 3D-printed tube and (B) a photograph of the 3D-printed tube.

**Video S1:** A movie illustrating the separation process carried out with our superhydrophobic plasma separator.
